# Supplementary material for: Mercaptopurine versus placebo to prevent recurrence of Crohn's disease after surgical resection (TOPPIC): a multicentre, double-blind, randomised controlled trial
Source: PubMed Central journal article supplement (PMC6358144; doi:10.1016/s2468-1253(16)30078-4), 2016-08-30

# THE LANCET

## Gastroenterology & Hepatology

### Supplementary appendix

This appendix formed part of the original submission and has been peer reviewed.  
We post it as supplied by the authors.

Supplement to: Mowat C, Arnott I, Cahill A, et al, for the TOPPIC Study Group.  
Mercaptopurine versus placebo to prevent recurrence of Crohn's disease after  
surgical resection (TOPPIC): a multicentre, double-blind, randomised controlled trial.  
*Lancet Gastroenterol Hepatol* 2016; published online Aug 30. [http://dx.doi.org/10.1016/S2468-1253\(16\)30078-4](http://dx.doi.org/10.1016/S2468-1253(16)30078-4).

## TOPPIC Web appendix

### Contents

|                                                                                                                                                                                                                      |    |
|----------------------------------------------------------------------------------------------------------------------------------------------------------------------------------------------------------------------|----|
| TOPPIC Study Group members                                                                                                                                                                                           | 2  |
| Supplementary table 1: Inclusion and Exclusion Criteria for the TOPPIC Trial                                                                                                                                         | 4  |
| Supplementary table 2: Dose reduction algorithm                                                                                                                                                                      | 5  |
| Supplementary table 3: Overview of Trial Procedures                                                                                                                                                                  | 6  |
| Supplementary table 4: Recruitment to TOPPIC per centre                                                                                                                                                              | 7  |
| Supplementary table 5: Data and sample completion rates across TOPPIC trial outcomes                                                                                                                                 | 8  |
| Supplementary table 6: Sensitivity and specificity (and 95% CIs) of faecal calprotectin for prediction of post-operative endoscopic recurrence of Crohn's disease (Rutgeerts' $\geq$ i2)                             | 9  |
| Supplementary table 7: Adverse events stratified by category, severity and treatment group                                                                                                                           | 10 |
| Supplementary figure 1: Meta-analysis of published randomised controlled trial data comparing thiopurines to placebo for prevention of post-operative recurrence within 12 months in Crohn's disease                 | 11 |
| Supplementary figure 2: Faecal calprotectin concentrations measured at weeks 49 and 157 plotted against corresponding Rutgeerts' score for endoscopic recurrence of Crohn's disease                                  | 12 |
| Supplementary figure 3: Thioguanine nucleotide (TGN) blood concentrations in patients receiving MP plotted by study week, and grouped according to therapeutic range (<235 – 450, pmol/8x10 <sup>8</sup> RBC), n=128 | 13 |
| Supplementary figure 4: Endoscopic recurrence of Crohn's disease as measured by Rutgeerts' score at Week 49 post-randomisation in patients on mercaptopurine (MP) vs placebo                                         | 14 |
| Supplementary figure 5: Endoscopic recurrence of Crohn's disease as measured by Rutgeerts' score at Week 157 post-randomisation in patients on mercaptopurine (MP) vs placebo comparing MP vs placebo                | 15 |

## TOPPIC Study Group members

### Site teams

*Aberdeen Royal Infirmary, Aberdeen*

Malcolm Smith<sup>4</sup>, Aileen J McKinley<sup>29</sup>, John M Thomson<sup>4</sup>, Ashley Mowat<sup>4</sup>

*Barts and the London, London*

James O Lindsay<sup>26</sup>, Louise Langmead<sup>26</sup>

*Bristol Royal Infirmary, Bristol*

Tom Creed<sup>13</sup>

*Darlington Memorial Hospital, Darlington and University Hospital of North Durham, Durham*

Anjan Dhar<sup>10</sup>

*Derriford Hospital, Plymouth*

Stephen J Lewis<sup>18</sup>

*Glasgow Royal Infirmary, Glasgow*

Aiden Cahill<sup>3</sup>, John Morris<sup>3</sup>, Daniel R Gaya<sup>3</sup>, Jack Winter<sup>3</sup>, Graham D Naismith<sup>31</sup>

*Hull Royal Infirmary, Hull*

Shaji Sebastian<sup>19</sup>

*John Radcliffe Hospital, Oxford*

Simon Travis<sup>8</sup>

*Leeds General Infirmary, Leeds*

John Hamlin<sup>9</sup>

*Manchester Royal Infirmary, Manchester*

Simon Campbell<sup>17</sup>, Scott Levison<sup>17</sup>

*Ninewells, Dundee*

Craig Mowat<sup>1</sup>, John A Todd<sup>1</sup>

*North Staffs, Stoke-on-Trent (now Royal Stoke University Hospital)*

Sandip Sen<sup>20</sup>

*Queen Elizabeth Hospital, Birmingham*

Jason Goh<sup>25</sup>

*Queen's Medical Centre, Nottingham*

Chris Hawkey<sup>22</sup>

*Raigmore, Inverness*

Lindsay Potts<sup>28</sup>

*Rotherham General Hospital, Rotherham*

Mohamed Yousif<sup>15</sup>, Pierre Willemse<sup>15</sup>

*Royal Devon and Exeter Hospital, Exeter*

Tariq Ahmad<sup>5,6</sup>

*Royal Free, London*

Charles Murray<sup>23</sup>

*Royal Liverpool University Hospital, Liverpool*

Sreedhar Subramanian<sup>7</sup>

*Salford Royal Infirmary, Salford*

Simon Lal<sup>21</sup>

*Singleton Hospital, Swansea*

Linzi Thomas<sup>16</sup>

*Southampton General Hospital, Southampton*

Fraser Cummings<sup>24</sup>

*St Marks, London*

Naila Arebi<sup>27</sup>

*Torbay Hospital, Torquay*

Cathryn Edwards<sup>12</sup>

*UCLH, London*

Stuart Bloom<sup>14</sup>

*University Hospital Coventry, Coventry*

Chuka Nwokolo<sup>11</sup>

*Western General Hospital, Edinburgh*

Ian Arnott<sup>2</sup>, Mhairi Collie<sup>30</sup>, Malcolm G Dunlop<sup>30</sup>,

Nicholas A Kennedy<sup>2,6</sup>, Jack Satsangi<sup>2</sup>, Charlie Lees<sup>2</sup>,

David Bartolo<sup>30,34</sup>

### Trial steering committee

John Mansfield<sup>35</sup>, Chris SJ Probert<sup>36</sup>, Stuart Ralston<sup>37</sup>, Ruth Slater

### Data monitoring committee

Stephen JW Evans<sup>38</sup>, Helen Gillett<sup>39</sup>, Huw Roddie<sup>40</sup>

### ECTU

Holly Ennis<sup>32</sup>, Gail Campbell<sup>32</sup>, Audrey Duncan<sup>32</sup>, Audrey Duncan<sup>32</sup>, Debra Kerr<sup>32</sup>, Ashma Krishan<sup>32</sup>, Garry Milne<sup>32</sup>, Lynsey Milne<sup>32</sup>, Gail Scott<sup>32</sup>, Samantha Thomas<sup>32</sup>, Allan Walker<sup>32</sup>, Helen Watters<sup>32</sup>

### ACCORD

Marise Bucukoglu<sup>41</sup>, Anne Langston<sup>41</sup>

### Statistical team

Catriona Keerie<sup>32</sup>, Steff Lewis<sup>32</sup>, Robin J Prescott<sup>33</sup>

### Laboratory teams

*Cedars-Sinai F. Widjaja Foundation Inflammatory Bowel and Immunobiology Research Institute, Cedars-Sinai Medical Centre, Los Angeles*

Michelle (Xiaoxiao) Li<sup>44</sup>, Dermot McGovern<sup>44</sup>

*Dept of Clinical Chemistry, Western General Hospital, Edinburgh*

Ann Jarvie<sup>43</sup>, Julie Nichols<sup>43</sup>, Susan A Walker<sup>43</sup>

*Dept of Pathology, Western General Hospital, Edinburgh*

David Worrall<sup>46</sup>

*Purine Research Laboratory, St Thomas' Hospital, London*

Tony Marinaki<sup>45</sup>

*Wellcome Trust Clinical Research Facility, University of Edinburgh, Edinburgh*

Mark Blandford<sup>42</sup>, Lee Murphy<sup>42</sup>

<sup>1</sup>Gastrointestinal Unit, Ninewells Hospital, Dundee, UK. <sup>2</sup>Gastrointestinal Unit, Western General Hospital, Edinburgh, UK. <sup>3</sup>Gastrointestinal Unit, Glasgow Royal Infirmary, Glasgow, UK. <sup>4</sup>Gastrointestinal Unit, Aberdeen Royal Infirmary, Aberdeen, UK. <sup>5</sup>Dept of Gastroenterology, Royal Devon and Exeter Hospital NHS Foundation Trust, Exeter, UK. <sup>6</sup>IBD Pharmacogenetics Unit, University of Exeter, Exeter, UK. <sup>7</sup>Dept of Gastroenterology, Royal Liverpool University Hospital, Liverpool, UK. <sup>8</sup>Translational Gastroenterology Unit, Nuffield Department of Experimental Medicine, University of Oxford, Oxford, UK. <sup>9</sup>Dept of Gastroenterology, Leeds General Infirmary, Leeds Teaching Hospitals NHS Trust, Leeds, UK. <sup>10</sup>Dept of Gastroenterology, Darlington Memorial Hospital, Darlington, UK. <sup>11</sup>Dept of Gastroenterology, University Hospital Coventry and Warwickshire NHS Trust, Coventry, UK. <sup>12</sup>Dept of Gastroenterology, Torbay Hospital, South Devon Healthcare NHS Foundation Trust, Torbay, Devon, UK. <sup>13</sup>Dept of Gastroenterology, Bristol Royal Infirmary, University Hospitals Bristol NHS Foundation Trust, Bristol, UK. <sup>14</sup>Dept of Gastroenterology, University College London Hospitals NHS Foundation Trust, London, UK. <sup>15</sup>Dept of Gastroenterology, Rotherham NHS Foundation Trust Hospital, Rotherham, UK. <sup>16</sup>Dept of Gastroenterology, Singleton Hospital, Abertawe Bro Morgannwg University Health Board, Swansea, UK. <sup>17</sup>Dept of Gastroenterology, Manchester Royal Infirmary, Central Manchester University Hospitals NHS Foundation Trust, Manchester, UK. <sup>18</sup>Dept of Gastroenterology, Derriford Hospital, Plymouth Hospitals NHS Trust, Plymouth, UK. <sup>19</sup>Dept of Gastroenterology, Hull Royal Infirmary, Hull and East Yorkshire Hospitals NHS Trust, Hull, UK. <sup>20</sup>Dept of Gastroenterology, Royal Stoke University Hospital, University Hospitals of North Midlands NHS Trust, Stoke-on-Trent, UK. <sup>21</sup>Dept of Gastroenterology, Salford Royal NHS Foundation Trust Hospital, Salford, UK. <sup>22</sup>Dept of Gastroenterology, Nottingham University Hospitals NHS Trust, Nottingham, UK. <sup>23</sup>Dept of Gastroenterology, Royal Free London NHS Foundation Trust Hospital, London, UK. <sup>24</sup>Dept of Gastroenterology, Southampton General Hospital, University Hospital Southampton NHS Foundation Trust, Southampton, UK. <sup>25</sup>Dept of Gastroenterology, Queen Elizabeth Hospital, University Hospitals Birmingham NHS Foundation Trust, Birmingham, UK. <sup>26</sup>Dept of Gastroenterology, Barts Health NHS Trust, Barts and the London School of Medicine, London, UK. <sup>27</sup>Inflammatory Bowel Disease Unit, St Mark's Hospital, North West London Hospitals NHS Trust, London, UK. <sup>28</sup>Gastrointestinal Unit, Raigmore Hospital, Inverness, UK. <sup>29</sup>Dept of Surgery, Aberdeen Royal Infirmary, Aberdeen, UK. <sup>30</sup>Colorectal Surgery, Western General Hospital, Edinburgh, UK. <sup>31</sup>Gastrointestinal Unit, Princess Alexandra Hospital, Paisley, UK. <sup>32</sup>Edinburgh Clinical Trials Unit, Usher Institute, University of Edinburgh, Edinburgh, UK. <sup>33</sup>Usher Institute, University of Edinburgh, Edinburgh, UK. <sup>34</sup>Dept of Colorectal Surgery, Fiona Stanley Hospital, Murdoch, WA, Australia. <sup>35</sup>Dept of Gastroenterology, Victoria Royal Infirmary, Newcastle, UK. <sup>36</sup>Gastroenterology, Cellular and Molecular Physiology, University of Liverpool, Liverpool, UK. <sup>37</sup>Rheumatology and Bone Disease, Institute of Genetics and Molecular Medicine, University of Edinburgh, Edinburgh, UK. <sup>38</sup>Department of Medical Statistics, London School of Hygiene and Tropical Medicine, London, UK. <sup>39</sup>Gastrointestinal Unit, Royal Hospital for Sick Children, Edinburgh, UK. <sup>40</sup>Dept of Haematology, Western General Hospital, Edinburgh, UK. <sup>41</sup>ACCORD, University of Edinburgh, Edinburgh, UK. <sup>42</sup>Wellcome Trust Clinical Research Facility, University of Edinburgh, Edinburgh, UK. <sup>43</sup>Dept of Clinical Chemistry, Western General Hospital, Edinburgh, UK. <sup>44</sup>Cedars-Sinai F. Widjaja Foundation Inflammatory Bowel and Immunobiology Research Institute, Cedars-Sinai Medical Centre, Los Angeles, California, USA. <sup>45</sup>Purine Research Laboratory, St Thomas' Hospital, London, UK. <sup>46</sup>Dept of Pathology, Western General Hospital, Edinburgh, UK.

## Supplementary table 1: Inclusion and Exclusion Criteria for the TOPPIC Trial

| <b>Inclusion Criteria</b>                                                                                                                                                                                                                                                                                                                                                                                                                                                                                                                                                                                                                                                                                                                                                                                                                                                                                                                                                                                                                                                                                                                                                                                                                                                                                                                                                                                                                                                                                                                                                                                                                                                                                                                                                                                                                                                                                                                                                                                                                                                                                                                                                                                                                                                          |
|------------------------------------------------------------------------------------------------------------------------------------------------------------------------------------------------------------------------------------------------------------------------------------------------------------------------------------------------------------------------------------------------------------------------------------------------------------------------------------------------------------------------------------------------------------------------------------------------------------------------------------------------------------------------------------------------------------------------------------------------------------------------------------------------------------------------------------------------------------------------------------------------------------------------------------------------------------------------------------------------------------------------------------------------------------------------------------------------------------------------------------------------------------------------------------------------------------------------------------------------------------------------------------------------------------------------------------------------------------------------------------------------------------------------------------------------------------------------------------------------------------------------------------------------------------------------------------------------------------------------------------------------------------------------------------------------------------------------------------------------------------------------------------------------------------------------------------------------------------------------------------------------------------------------------------------------------------------------------------------------------------------------------------------------------------------------------------------------------------------------------------------------------------------------------------------------------------------------------------------------------------------------------------|
| A patient will be considered eligible for inclusion in the study if all of the following criteria apply: <ol style="list-style-type: none"><li>1. At least 16 years of age in Scotland and 18 years of age in England and Wales.</li><li>2. Established diagnosis of Crohn's disease confirmed at recent resection.</li><li>3. Ileocolonic or small bowel resection within 3 months before screening.</li><li>4. No more than 100 cm of fixed small bowel resected in total. Previous ileocolonic resection is acceptable.</li><li>5. Able to start oral nutrition within the first 2 postoperative weeks.</li><li>6. Normal or heterozygous TPMT (activity present or reduced consistent with carrier status).</li><li>7. Able to provide written informed consent prior to screening and to comply with the requirements of the study protocol.</li><li>8. Off antibiotics 2 weeks prior to randomisation.</li></ol>                                                                                                                                                                                                                                                                                                                                                                                                                                                                                                                                                                                                                                                                                                                                                                                                                                                                                                                                                                                                                                                                                                                                                                                                                                                                                                                                                             |
| <b>Exclusion Criteria</b>                                                                                                                                                                                                                                                                                                                                                                                                                                                                                                                                                                                                                                                                                                                                                                                                                                                                                                                                                                                                                                                                                                                                                                                                                                                                                                                                                                                                                                                                                                                                                                                                                                                                                                                                                                                                                                                                                                                                                                                                                                                                                                                                                                                                                                                          |
| A patient will <u>not</u> be eligible for inclusion in the study if any of the following criteria apply: <ol style="list-style-type: none"><li>1. Pregnancy at baseline or breast feeding.</li><li>2. A known hypersensitivity or intolerance to 6MP</li><li>3. Pancreatitis associated with azathioprine.</li><li>4. Receiving an experimental treatment for Crohn's disease in the 4 weeks prior to study entry.</li><li>5. Known to require further surgery at study entry i.e. for the removal of an abscess developing from the primary surgery.</li><li>6. Strictureplasty procedure alone</li><li>7. (Please note that strictureplasty and resection procedure together will not be considered an exclusion.)</li><li>8. Presence of stoma.</li><li>9. Significant haematological, renal or hepatic dysfunction or clinically important lung disease (i.e. liver function tests (except GGT) &gt;x2 upper limit of normal, Haemoglobin <math>\leq 10</math>, total white blood cell count &lt;3.5, Neutrophils &lt;1.5, Platelets &lt;100x10<sup>9</sup>/l).</li><li>10. Systemic infection including hepatitis B, hepatitis C, HIV and active TB.</li><li>11. A diagnosis of indeterminate colitis or ulcerative colitis.</li><li>12. A history of illicit drug or alcohol abuse in the 1 year prior to study entry.</li><li>13. Active or untreated malignancy (excluding basal cell carcinoma and insitu tumours). (Patients who have had successful treatment for malignancy and have been in remission for more than 5 years may be considered for inclusion only after detailed discussion with, and written approval, from the patient's medical oncologist.)</li><li>14. Presence of a medical or psychiatric condition, disease or laboratory abnormality that in the opinion of the PI may place the subject at unacceptable risk during the study.</li><li>15. Homozygous deficient for TPMT (absent activity)</li><li>16. Evidence of untreated post-operative infection e.g. clostridium difficile, urinary tract infection or chest infection. If these have been appropriately treated in the opinion of the PI, and inclusion criteria 8 is met, this will not be considered an exclusion.</li><li>17. Taking any medication for Crohn's disease.</li></ol> |

## Supplementary table 2: Dose reduction algorithm

|                 |                                                                                                                                                                                                                                                                                                                                                                                                                                                                                                                                                                                                                                                                                                                                                                                                                                                                                |
|-----------------|--------------------------------------------------------------------------------------------------------------------------------------------------------------------------------------------------------------------------------------------------------------------------------------------------------------------------------------------------------------------------------------------------------------------------------------------------------------------------------------------------------------------------------------------------------------------------------------------------------------------------------------------------------------------------------------------------------------------------------------------------------------------------------------------------------------------------------------------------------------------------------|
| <b>Option 1</b> | No action required as not deemed to be a safety issue (Some abnormal results will be at the discretion of the Investigators as to whether they require any action.)                                                                                                                                                                                                                                                                                                                                                                                                                                                                                                                                                                                                                                                                                                            |
| <b>Option 2</b> | Hb<10.0: E-mail local nurse to telephone patient and arrange for review and assessment by Investigator as would be done in routine clinical practice. Anaemia could be caused by a number of reasons so this should not affect the study blind.                                                                                                                                                                                                                                                                                                                                                                                                                                                                                                                                                                                                                                |
| <b>Option 3</b> | Total White Cell Count 2.5-3.5, <b>or</b> Neutrophil count between 1.0 and 2.0 <b>or</b> any LFT (except GGT) between >2 and 5 times the upper limit of normal <b>or</b> Platelet count between 50-100x10 <sup>9</sup> /l:<br>Email local nurse who will telephone patient to reduce dose. Ensure safety bloods are done within 1 week at local site. This should not affect the study blind.                                                                                                                                                                                                                                                                                                                                                                                                                                                                                  |
| <b>Option 4</b> | Total White Cell Count <2.5 or Neutrophil count <1.0 or Any LFT >x5 upper limit of normal or platelet count <50x10 <sup>6</sup> /l: Email and telephone local nurse who will telephone patient to discontinue the study drug, arrange for immediate patient review by Investigator and repeat bloods, at weekly intervals, until resolved. At the duty clinicians' discretion drug could be recommenced or the dose reduced [see Para 7.7 of Protocol Dose Reduction Schedule (Table 2)], if out of range values improve above the lower limits designated. Patient will continue as per protocol. Otherwise study drug would be stopped and patient should continue with scheduled visits but not take any more IMP. (The breaking of the study blind will only be performed where knowledge of the treatment is absolutely necessary for further management of the patient). |

**Supplementary table 3: Overview of Trial Procedures**

| Visit number                                                       | -1                       | 1            | 2                                   | 3                         | 4           | 5           | 6           | 7           | 8           | 9           | 10          | 11          | 12                |
|--------------------------------------------------------------------|--------------------------|--------------|-------------------------------------|---------------------------|-------------|-------------|-------------|-------------|-------------|-------------|-------------|-------------|-------------------|
| Study Week No                                                      | -4                       | -1           | 0                                   | 6                         | 13          | 31          | 49          | 67          | 85          | 103         | 121         | 139         | 157               |
| Visit purpose                                                      | Inpatient pre-assessment | Safety Visit | Randomisation and drug prescription | Interim safety assessment | Study visit | Study visit | Study visit | Study visit | Study visit | Study visit | Study visit | Study visit | Final study visit |
| Inc/Exc Criteria                                                   | x                        |              |                                     |                           |             |             |             |             |             |             |             |             |                   |
| Consent Form                                                       | x                        |              | x                                   |                           |             |             |             |             |             |             |             |             |                   |
| Patient Information Leaflet                                        | x                        |              |                                     |                           |             |             |             |             |             |             |             |             |                   |
| TPMT                                                               | x                        |              |                                     |                           |             |             |             |             |             |             |             |             |                   |
| Stool Sample                                                       | x                        |              |                                     |                           |             |             |             |             |             |             |             |             |                   |
| Pregnancy Test                                                     |                          |              | x                                   |                           |             |             |             |             |             |             |             |             |                   |
| Clinic Visit                                                       |                          | x            | x                                   | x                         | x           | x           | x           | x           | x           | x           | x           | x           | x                 |
| Medical History                                                    |                          |              | x                                   |                           |             |             |             |             |             |             |             |             |                   |
| CDAI (Diary to be completed by patient 7 days prior to this visit) |                          |              | x                                   | x                         | x           | x           | x           | x           | x           | x           | x           | x           | x                 |
| Weight                                                             |                          |              | x                                   | x                         | x           | x           | x           | x           | x           | x           | x           | x           | x                 |
| Height                                                             |                          |              | x                                   |                           |             |             |             |             |             |             |             |             |                   |
| Study Drug                                                         |                          |              | x                                   | x                         | x           | x           | x           | x           | x           | x           | x           | x           |                   |
| Physical exam inc vital signs                                      |                          |              | x                                   | x                         | x           | x           | x           | x           | x           | x           | x           | x           | x                 |
| AEs                                                                |                          | x            | x                                   | x                         | x           | x           | x           | x           | x           | x           | x           | x           | x                 |
| Blood Safety Monitoring*                                           |                          | x            |                                     | x                         | x           | x           | x           | x           | x           | x           | x           | x           | x                 |
| 6MP Metabolite Levels                                              |                          |              | x                                   |                           |             |             | x           |             |             | x           |             |             | x                 |
| Faecal Calprotectin                                                |                          |              | x                                   |                           |             |             | x           |             |             | x           |             |             | x                 |
| Colonoscopy & Biopsy                                               |                          |              |                                     |                           |             |             | x           |             |             |             |             |             | x                 |
| IBDQ, SF-36 & EQ-5D                                                |                          |              | x                                   |                           |             |             | x           |             |             | x           |             |             | x                 |
| Prohibited Meds                                                    |                          |              |                                     | x                         | x           | x           | x           | x           | x           | x           | x           | x           | x                 |
| Genetic Studies                                                    |                          |              | X                                   |                           |             |             |             |             |             |             |             |             |                   |
| Serological Studies                                                |                          |              | X                                   |                           |             |             |             |             |             |             |             |             |                   |

**Supplementary table 4: Recruitment to TOPPIC per centre**

| Centre                                                                | Principal Investigator  | Number of patients | % of patients |
|-----------------------------------------------------------------------|-------------------------|--------------------|---------------|
| Western General Hospital, Edinburgh                                   | Dr Ian Arnott           | 78                 | 32.5          |
| Ninewells, Dundee                                                     | Dr Craig Mowat          | 21                 | 8.8           |
| Stobhill Hospital, Glasgow                                            | Dr Aidan Cahill         | 19                 | 7.9           |
| Aberdeen Royal Infirmary, Aberdeen                                    | Dr Malcolm Smith        | 17                 | 7.1           |
| Royal Devon and Exeter Hospital, Exeter                               | Dr Tariq Ahmad          | 11                 | 4.6           |
| John Radcliffe Hospital, Oxford                                       | Dr Simon Travis         | 9                  | 3.8           |
| Glasgow Royal Infirmary, Glasgow                                      | Dr John Morris          | 8                  | 3.3           |
| Royal Liverpool University Hospital, Liverpool                        | Sreedhar Subramanian    | 8                  | 3.3           |
| Leeds General Infirmary, Leeds                                        | Dr John Hamlin          | 8                  | 3.3           |
| University Hospital Coventry, Coventry                                | Professor Chuka Nwokolo | 6                  | 2.5           |
| Torbay Hospital, Torquay                                              | Dr Cathryn Edwards      | 6                  | 2.5           |
| University Hospital of North Durham, Durham                           | Dr Anjan Dhar           | 6                  | 2.5           |
| Bristol Royal Infirmary, Bristol                                      | Dr Tom Creed            | 5                  | 2.1           |
| UCLH, London                                                          | Dr Stuart Bloom         | 5                  | 2.1           |
| Singleton Hospital, Swansea                                           | Dr Linzi Thomas         | 4                  | 1.7           |
| Rotherham General Hospital, Rotherham                                 | Dr Mohamed Yousif       | 4                  | 1.7           |
| Manchester Royal Infirmary, Manchester                                | Dr Simon Campbell       | 3                  | 1.2           |
| Derriford Hospital, Plymouth                                          | Dr Stephen Lewis        | 3                  | 1.2           |
| Hull Royal Infirmary, Hull                                            | Dr Shaji Sebastian      | 3                  | 1.2           |
| Salford Royal Infirmary, Salford                                      | Dr Simon Lal            | 2                  | 0.8           |
| Royal Free, London                                                    | Dr Charles Murray       | 2                  | 0.8           |
| Southampton General Hospital, Southampton                             | Dr Fraser Cummings      | 2                  | 0.8           |
| Queen's Medical Centre, Nottingham                                    | Professor Chris Hawkey  | 2                  | 0.8           |
| Queen Elizabeth Hospital, Birmingham                                  | Dr Jason Goh            | 2                  | 0.8           |
| Darlington Memorial Hospital, Darlington                              | Dr Anjan Dhar           | 2                  | 0.8           |
| Barts and the London, London                                          | Dr James Lindsay        | 1                  | 0.4           |
| North Staffs, Stoke-on-Trent<br>(now Royal Stoke University Hospital) | Dr Sandip Sen           | 1                  | 0.4           |
| St Marks, London                                                      | Dr Naila Arebi          | 1                  | 0.4           |
| Raigmore, Inverness                                                   | Dr Lindsay Potts        | 1                  | 0.4           |



**Supplementary table 5: Data and sample completion rates across TOPPIC trial outcomes**

| Parameter     | Timepoint post-randomisation | 6MP (n=128) | Placebo (n=112) | Overall (n=240) |
|---------------|------------------------------|-------------|-----------------|-----------------|
| Clinical data | Week 0                       | 128 (100)   | 112 (100)       | 240 (100)       |
| Clinical data | Week 6                       | 123 (96.1)  | 108 (96.4)      | 231 (96.3)      |
| Clinical data | Week 13                      | 117 (91.4)  | 107 (95.5)      | 224 (93.3)      |
| Clinical data | Week 31                      | 114 (89.1)  | 99 (88.4)       | 213 (88.8)      |
| Clinical data | Week 49                      | 111 (86.7)  | 97 (86.6)       | 208 (86.7)      |
| Clinical data | Week 67                      | 105 (82.0)  | 87 (77.7)       | 192 (80.0)      |
| Clinical data | Week 85                      | 100 (78.1)  | 83 (74.1)       | 183 (76.3)      |
| Clinical data | Week 103                     | 98 (76.6)   | 78 (69.6)       | 176 (73.3)      |
| Clinical data | Week 121                     | 94 (73.4)   | 74 (66.1)       | 168 (70.0)      |
| Clinical data | Week 139                     | 89 (69.5)   | 71 (63.4)       | 160 (66.7)      |
| Clinical data | Week 147                     | 89 (69.5)   | 71 (63.4)       | 161 (67.1)      |
| Colonoscopy   | Week 49                      | 95 (74)     | 77 (69)         | 172 (72)        |
| Colonoscopy   | Week 157                     | 69 (54)     | 59 (53)         | 128 (53)        |
| Calprotectin  | Week 0                       | 108         | 96              | 204             |
| Calprotectin  | Week 13                      | 94          | 87              | 181             |
| Calprotectin  | Week 49                      | 87          | 67              | 154             |
| Calprotectin  | Week 103                     | 69          | 55              | 124             |
| Calprotectin  | Week 157                     | 65          | 52              | 117             |
| 6-TGN         | Week 0                       | 124         | 110             | 234             |
| 6-TGN         | Week 13                      | 114         | 97              | 211             |
| 6-TGN         | Week 49                      | 102         | 86              | 188             |
| 6-TGN         | Week 103                     | 82          | 65              | 147             |
| 6-TGN         | Week 157                     | 64          | 57              | 121             |
| IBDQ          | Week 0                       | 128         | 111             | 239             |
| IBDQ          | Week 13                      | 117         | 106             | 223             |
| IBDQ          | Week 49                      | 109         | 94              | 203             |
| IBDQ          | Week 103                     | 97          | 75              | 172             |
| IBDQ          | Week 157                     | 86          | 69              | 155             |

**Supplementary table 6: Sensitivity and specificity (and 95% CIs) of faecal calprotectin for prediction of post-operative endoscopic recurrence of Crohn's disease (Rutgeerts'  $\geq$  i2)**

| Endoscopic Parameter    | FC cut-off ( $\mu\text{g/g}$ ) | Sensitivity          | Specificity          | PPV                  | NPV                  |
|-------------------------|--------------------------------|----------------------|----------------------|----------------------|----------------------|
| Recurrence ( $\geq$ i2) | 50                             | 84.4% (77.0%, 91.9%) | 44.4% (35.6%, 53.1%) | 52.4% (44.3%, 60.5%) | 79.7% (70.2%, 89.2%) |
|                         | 100 (optimum*)                 | 72.2% (63.0%, 81.5%) | 62.1% (53.6%, 70.6%) | 58.0% (48.9%, 67.2%) | 75.5% (67.1%, 83.8%) |
| Remission (i0)          | 50                             | 51.8% (38.7%, 64.9%) | 74.7% (67.9%, 81.5%) | 42.0% (30.4%, 53.7%) | 81.4% (75.0%, 87.7%) |
|                         | 100                            | 67.9% (55.6%, 80.1%) | 59.5% (51.8%, 67.2%) | 37.3% (27.9%, 46.6%) | 83.9% (77.1%, 90.7%) |
|                         | 60 (optimum*)                  | 55.4% (42.3%, 68.4%) | 70.9% (63.8%, 78.0%) | 40.3% (29.3%, 51.2%) | 81.8% (75.3%, 88.2%) |

These data derived from combined Visit 6 (week 49) and Visit 12 (week 157) data (n = 214)

\* Optimum cut-off point calculated by maximising Youden's J statistic.

**Supplementary table 7: Adverse events stratified by category, severity and treatment group**

| Category                                    | Mercaptopurine |          |        |            | Placebo |          |        |            |
|---------------------------------------------|----------------|----------|--------|------------|---------|----------|--------|------------|
|                                             | Mild           | Moderate | Severe | Total      | Mild    | Moderate | Severe | Total      |
| <b>Cancers</b>                              | 0              | 3        | 0      | <b>3</b>   | 0       | 0        | 1      | <b>1</b>   |
| <b>Deranged LFTs</b>                        | 0              | 4        | 0      | <b>4</b>   | 0       | 5        | 0      | <b>5</b>   |
| <b>GI Symptoms - Abdominal pain</b>         | 41             | 64       | 26     | <b>132</b> | 32      | 85       | 24     | <b>141</b> |
| <b>GI Symptoms - Constipation/diarrhoea</b> | 23             | 24       | 7      | <b>54</b>  | 17      | 31       | 8      | <b>56</b>  |
| <b>GI Symptoms - Nausea/vomiting</b>        | 25             | 42       | 11     | <b>78</b>  | 18      | 21       | 2      | <b>41</b>  |
| <b>GI Symptoms - Other</b>                  | 23             | 26       | 4      | <b>53</b>  | 22      | 18       | 0      | <b>40</b>  |
| <b>Headache</b>                             | 39             | 22       | 0      | <b>61</b>  | 17      | 18       | 3      | <b>38</b>  |
| <b>Infections</b>                           | 85             | 80       | 6      | <b>171</b> | 75      | 102      | 7      | <b>184</b> |
| <b>Joint pain/arthritis</b>                 | 28             | 40       | 4      | <b>72</b>  | 21      | 40       | 4      | <b>65</b>  |
| <b>Pain</b>                                 | 11             | 15       | 4      | <b>30</b>  | 4       | 12       | 3      | <b>19</b>  |
| <b>Pancreatitis</b>                         | 0              | 1        | 0      | <b>1</b>   | 0       | 0        | 1      | <b>1</b>   |
| <b>Rash</b>                                 | 21             | 12       | 2      | <b>35</b>  | 15      | 2        | 0      | <b>17</b>  |
| <b>Worsening Crohn's</b>                    | 6              | 29       | 6      | <b>41</b>  | 5       | 25       | 7      | <b>37</b>  |
| <b>Other</b>                                | 97             | 106      | 9      | <b>212</b> | 70      | 72       | 11     | <b>153</b> |

Numbers indicate total number of events. There was one case of abdominal pain in the mercaptopurine group with missing severity, and one mild event with a missing category.

**Supplementary figure 1: Meta-analysis of published randomised controlled trial data comparing thiopurines to placebo for prevention of post-operative recurrence within 12 months in Crohn's disease**

FE = Fixed effects

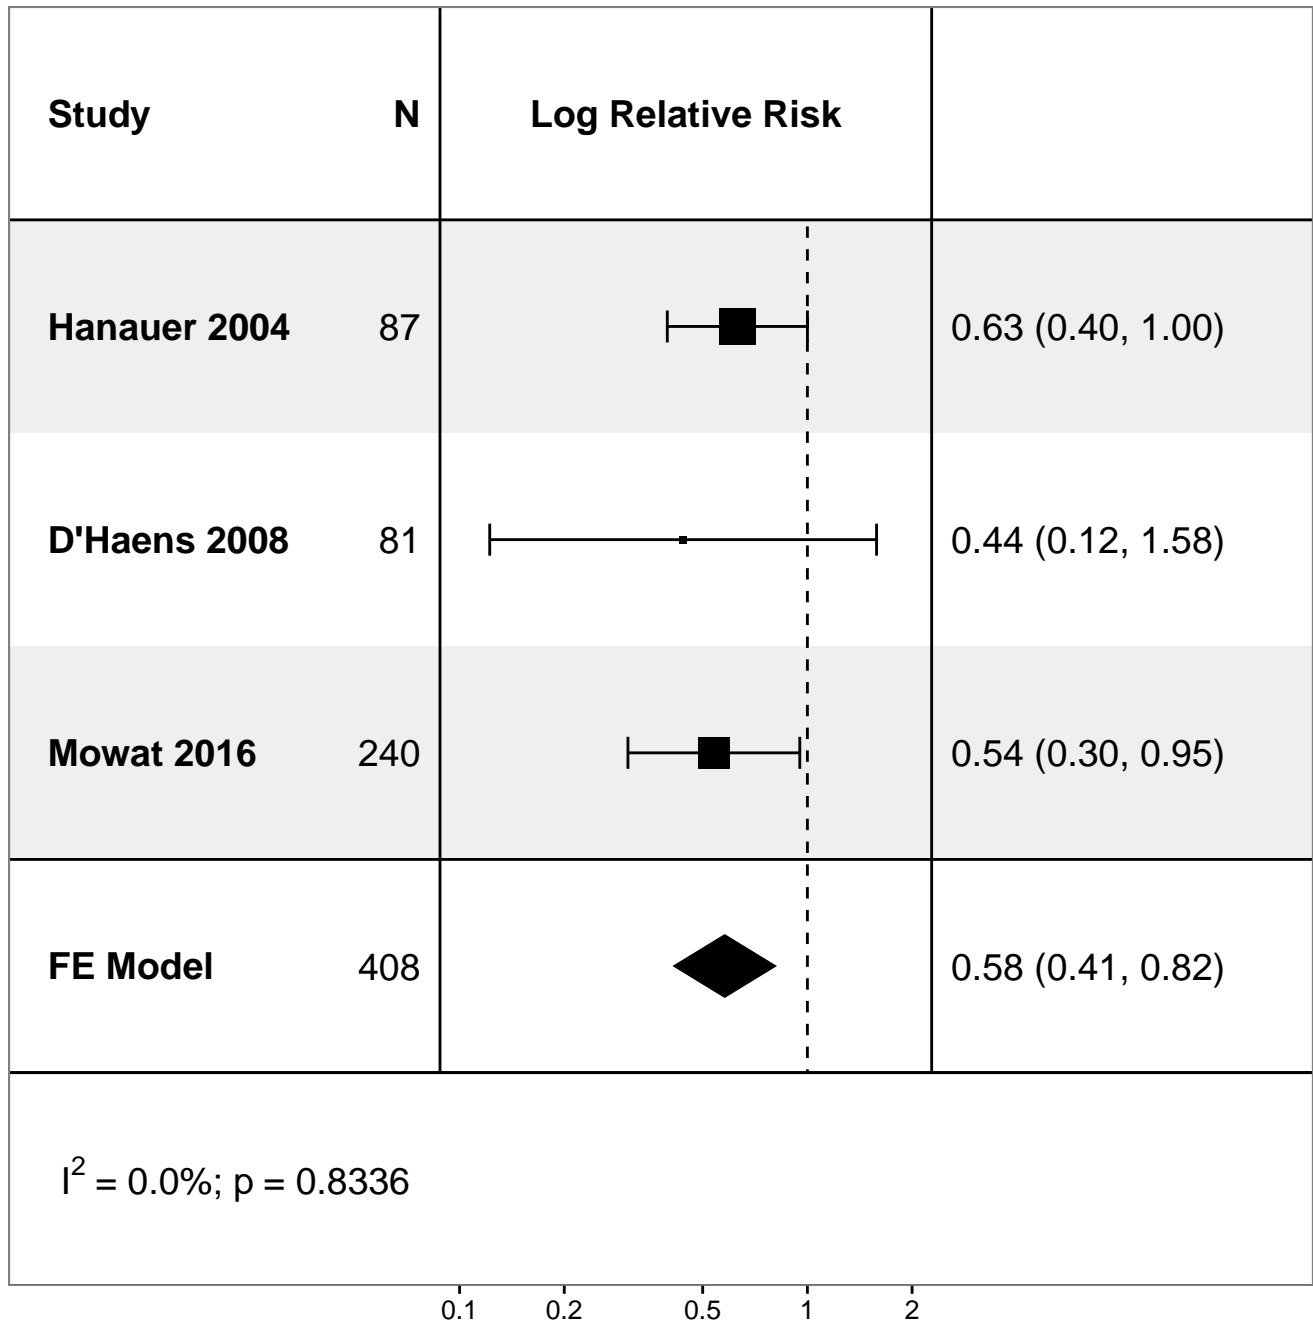

Supplementary figure 2: Faecal calprotectin concentrations measured at weeks 49 and 157 plotted against corresponding Rutgeerts' score for endoscopic recurrence of Crohn's disease

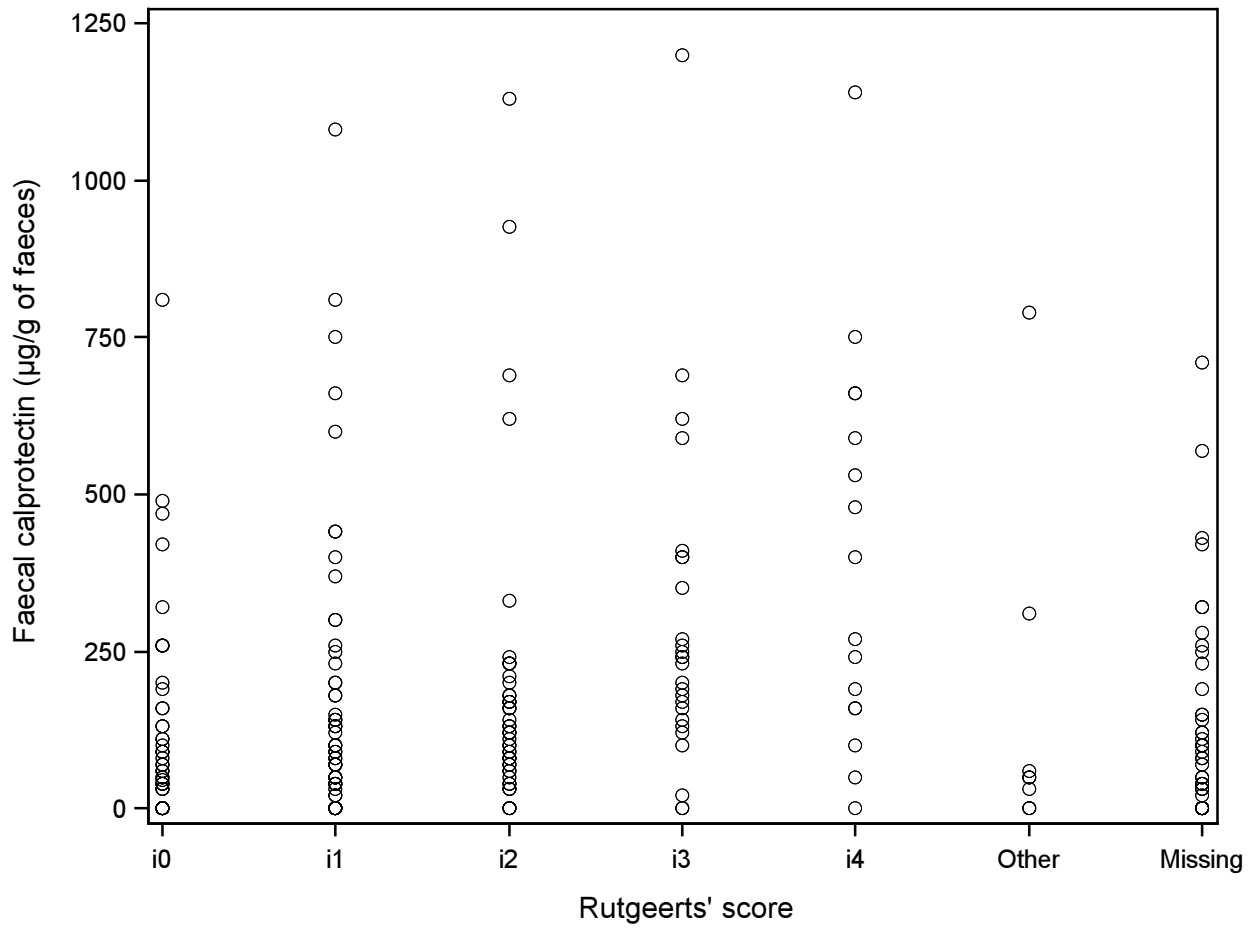

**Supplementary figure 3: Thioguanine nucleotide (TGN) blood concentrations in patients receiving MP plotted by study week, and grouped according to therapeutic range (<235 – 450, pmol/8x10<sup>8</sup> RBC), n=128**

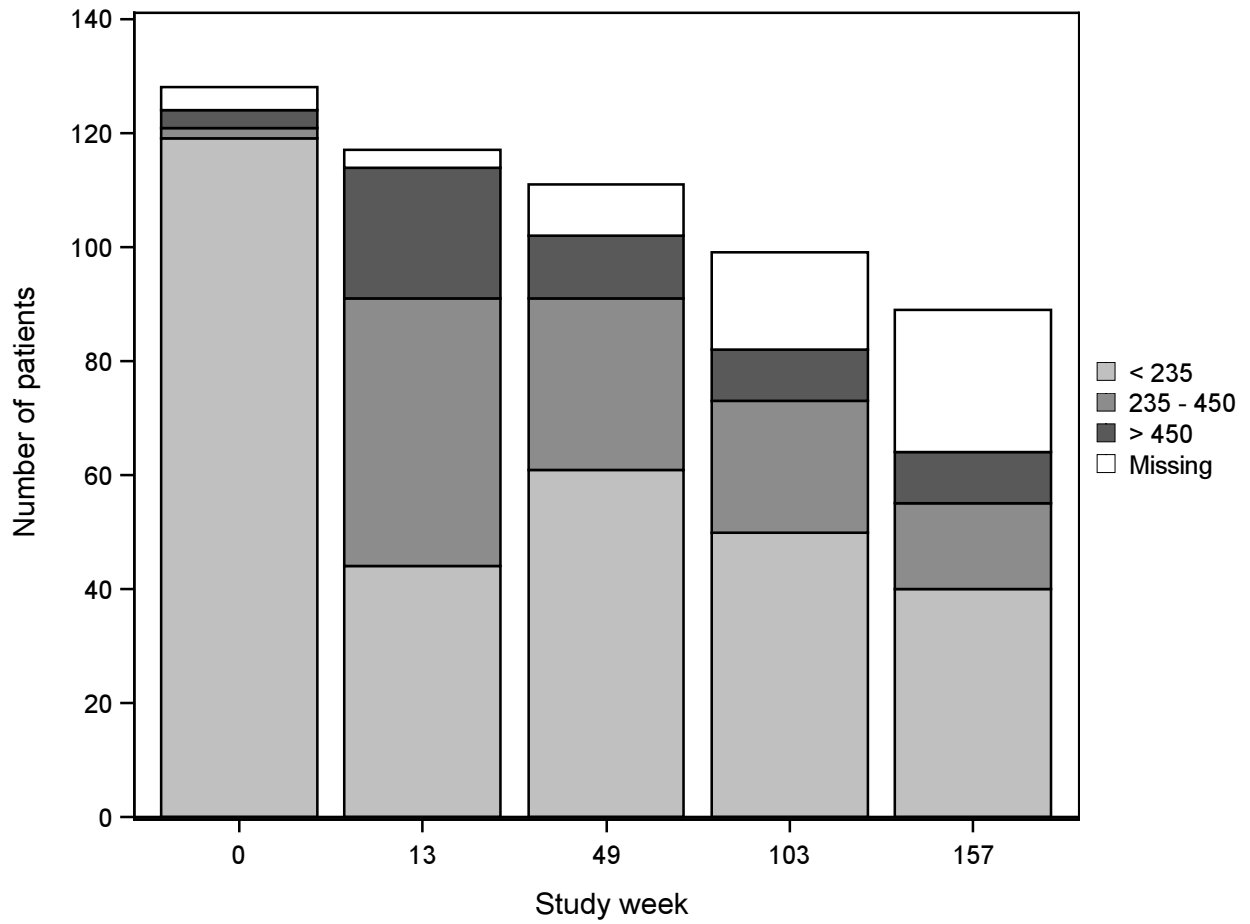

**Supplementary figure 4: Endoscopic recurrence of Crohn's disease as measured by Rutgeerts' score at Week 49 post-randomisation in patients on mercaptopurine (MP) vs placebo**

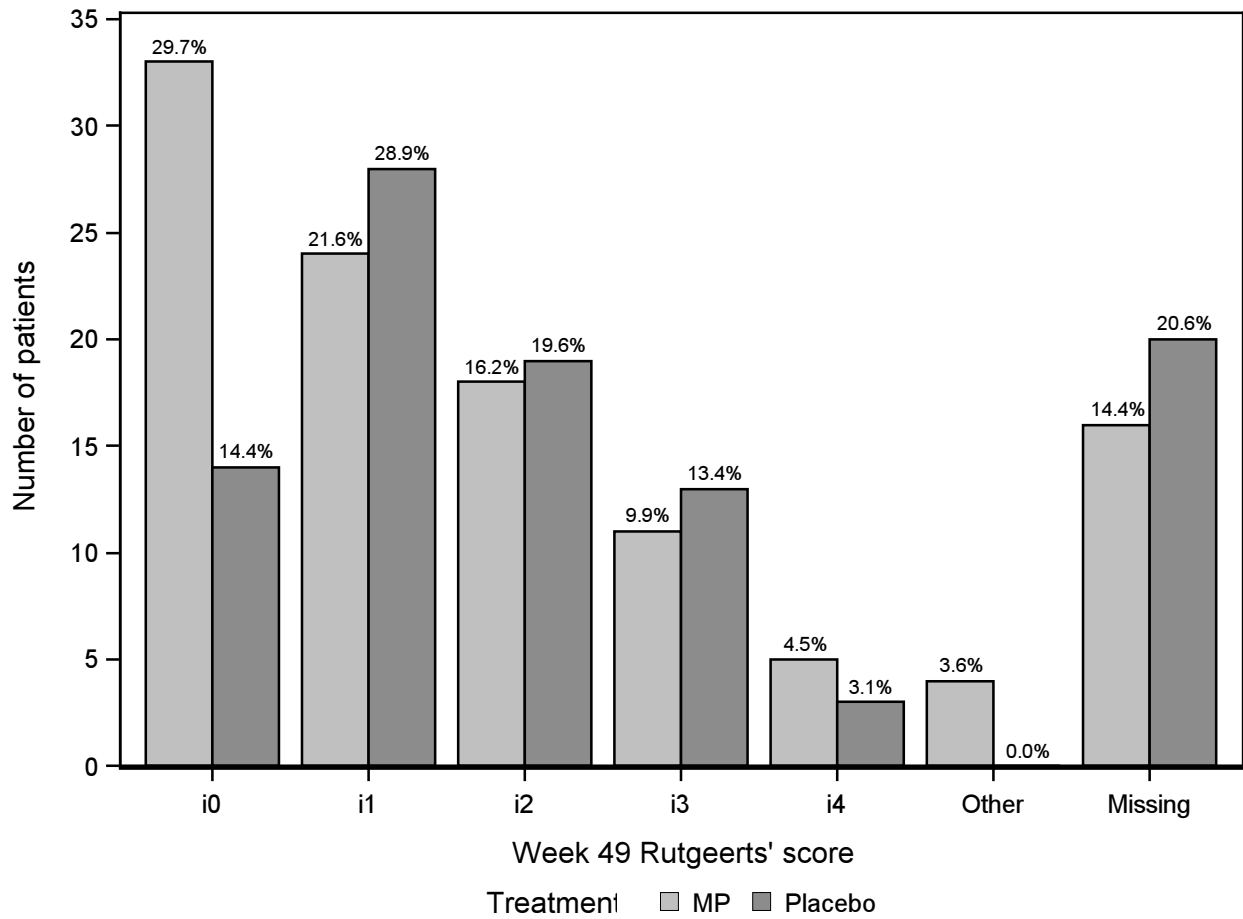

**Supplementary figure 5: Endoscopic recurrence of Crohn's disease as measured by Rutgeerts' score at Week 157 post-randomisation in patients on mercaptopurine (MP) vs placebo comparing MP vs placebo**

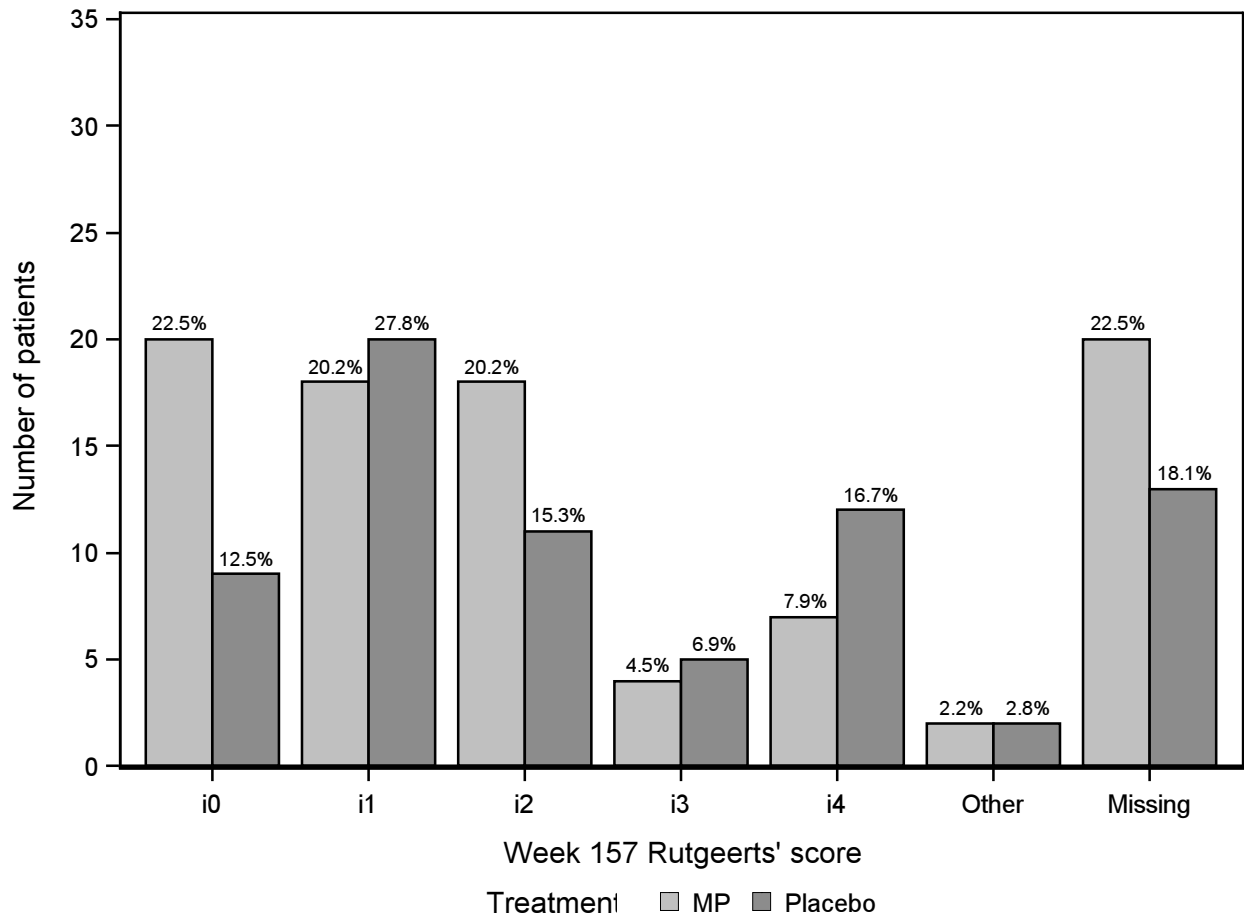

Supplement: mmc1.pdf [file mmc1.pdf]
